# Supplementary material for: PACT-3D, a deep learning algorithm for pneumoperitoneum detection in abdominal CT scans
Source: PubMed Central journal article supplement — Nat Commun. 2024 Nov 7;15:9660. doi: 10.1038/s41467-024-54043-1 (PMC11544264; doi:10.1038/s41467-024-54043-1), 2024-11-07
Supplement: 41467_2024_54043_MOESM2_ESM.pdf [file 41467_2024_54043_MOESM2_ESM.pdf]

## Reporting Summary

Nature Portfolio wishes to improve the reproducibility of the work that we publish. This form provides structure for consistency and transparency in reporting. For further information on Nature Portfolio policies, see our [Editorial Policies](#) and the [Editorial Policy Checklist](#).

### Statistics

For all statistical analyses, confirm that the following items are present in the figure legend, table legend, main text, or Methods section.

n/a Confirmed

- The exact sample size ( $n$ ) for each experimental group/condition, given as a discrete number and unit of measurement
- A statement on whether measurements were taken from distinct samples or whether the same sample was measured repeatedly
- The statistical test(s) used AND whether they are one- or two-sided  
*Only common tests should be described solely by name; describe more complex techniques in the Methods section.*
- A description of all covariates tested
- A description of any assumptions or corrections, such as tests of normality and adjustment for multiple comparisons
- A full description of the statistical parameters including central tendency (e.g. means) or other basic estimates (e.g. regression coefficient) AND variation (e.g. standard deviation) or associated estimates of uncertainty (e.g. confidence intervals)
- For null hypothesis testing, the test statistic (e.g.  $F$ ,  $t$ ,  $r$ ) with confidence intervals, effect sizes, degrees of freedom and  $P$  value noted  
*Give  $P$  values as exact values whenever suitable.*
- For Bayesian analysis, information on the choice of priors and Markov chain Monte Carlo settings
- For hierarchical and complex designs, identification of the appropriate level for tests and full reporting of outcomes
- Estimates of effect sizes (e.g. Cohen's  $d$ , Pearson's  $r$ ), indicating how they were calculated

*Our web collection on [statistics for biologists](#) contains articles on many of the points above.*

### Software and code

Policy information about [availability of computer code](#)

Data collection

The code developed to support the findings of this study is available online at <https://github.com/IMinChiu/pact-3d>. The modeling pipeline was implemented using Python (3.9) with PyTorch (2.0) and MONAI (1.3.0) as the deep learning framework. Image processing and data analysis were facilitated by Python libraries such as SimpleITK (2.2.1), scikit-image (0.20.0), pandas (2.0.2), and matplotlib (3.7.1), while SPSS was utilized for all subsequent statistical analyses.

Data analysis

The code developed to support the findings of this study is available online at <https://github.com/IMinChiu/pact-3d>. The modeling pipeline was implemented using Python (3.9) with PyTorch (2.0) and MONAI (1.3.0) as the deep learning framework. Image processing and data analysis were facilitated by Python libraries such as SimpleITK (2.2.1), scikit-image (0.20.0), pandas (2.0.2), and matplotlib (3.7.1), while SPSS was utilized for all subsequent statistical analyses.

For manuscripts utilizing custom algorithms or software that are central to the research but not yet described in published literature, software must be made available to editors and reviewers. We strongly encourage code deposition in a community repository (e.g. GitHub). See the Nature Portfolio [guidelines for submitting code & software](#) for further information.

## Data

Policy information about [availability of data](#)

All manuscripts must include a [data availability statement](#). This statement should provide the following information, where applicable:

- Accession codes, unique identifiers, or web links for publicly available datasets
- A description of any restrictions on data availability
- For clinical datasets or third party data, please ensure that the statement adheres to our [policy](#)

Given the sensitive nature of patient data and privacy regulations, we maintain strict control over data access to ensure compliance with institutional policies and legal requirements. To request access to the data, researchers must provide a detailed research proposal outlining the intended use of the data. Access requests can be directed to [goman178@gmail.com](mailto:goman178@gmail.com), and we aim to respond within 30 days. Approval will be contingent upon ethical review and the establishment of a data use agreement to safeguard patient privacy. Data usage will be restricted to non-commercial research purposes, and no attempts to re-identify individuals will be permitted.

## Research involving human participants, their data, or biological material

Policy information about studies with [human participants or human data](#). See also policy information about [sex, gender \(identity/presentation\), and sexual orientation](#) and [race, ethnicity and racism](#).

|                                                                    |                                                                                                                                   |
|--------------------------------------------------------------------|-----------------------------------------------------------------------------------------------------------------------------------|
| Reporting on sex and gender                                        | This study did not investigate differences based on sex and gender.                                                               |
| Reporting on race, ethnicity, or other socially relevant groupings | This study did not investigate differences based on race and ethnicity.                                                           |
| Population characteristics                                         | This study reported population characteristics included age, sex, and machine vendors.                                            |
| Recruitment                                                        | Participants were included if they received abdominal CT scan in the studied hospital.                                            |
| Ethics oversight                                                   | This study received approval from the Institutional Review Board of Far Eastern Memorial Hospital and Cedars-Sinai Medical Center |

Note that full information on the approval of the study protocol must also be provided in the manuscript.

## Field-specific reporting

Please select the one below that is the best fit for your research. If you are not sure, read the appropriate sections before making your selection.

- Life sciences       Behavioural & social sciences       Ecological, evolutionary & environmental sciences

For a reference copy of the document with all sections, see [nature.com/documents/nr-reporting-summary-flat.pdf](https://www.nature.com/documents/nr-reporting-summary-flat.pdf)

## Life sciences study design

All studies must disclose on these points even when the disclosure is negative.

|                 |                                                                                                                                                                     |
|-----------------|---------------------------------------------------------------------------------------------------------------------------------------------------------------------|
| Sample size     | This study retrospectively included 140,339 CT scans and prospectively investigated 6,351 scans. An external validation was performed in an cohort of 480 CT scans. |
| Data exclusions | CT scan with acquisition error, format error, or without text report were excluded.                                                                                 |
| Replication     | This study provided data collection process and code of the deep learning algorithm for replication.                                                                |
| Randomization   | This study did not involved a randomization analysis.                                                                                                               |
| Blinding        | This study did not investigate blinding analysis.                                                                                                                   |

## Reporting for specific materials, systems and methods

We require information from authors about some types of materials, experimental systems and methods used in many studies. Here, indicate whether each material, system or method listed is relevant to your study. If you are not sure if a list item applies to your research, read the appropriate section before selecting a response.

## Materials &amp; experimental systems

| n/a                                 | Involvement in the study                               |
|-------------------------------------|--------------------------------------------------------|
| <input checked="" type="checkbox"/> | <input type="checkbox"/> Antibodies                    |
| <input checked="" type="checkbox"/> | <input type="checkbox"/> Eukaryotic cell lines         |
| <input checked="" type="checkbox"/> | <input type="checkbox"/> Palaeontology and archaeology |
| <input checked="" type="checkbox"/> | <input type="checkbox"/> Animals and other organisms   |
| <input checked="" type="checkbox"/> | <input type="checkbox"/> Clinical data                 |
| <input checked="" type="checkbox"/> | <input type="checkbox"/> Dual use research of concern  |
| <input checked="" type="checkbox"/> | <input type="checkbox"/> Plants                        |

## Methods

| n/a                                 | Involvement in the study                        |
|-------------------------------------|-------------------------------------------------|
| <input checked="" type="checkbox"/> | <input type="checkbox"/> ChIP-seq               |
| <input checked="" type="checkbox"/> | <input type="checkbox"/> Flow cytometry         |
| <input checked="" type="checkbox"/> | <input type="checkbox"/> MRI-based neuroimaging |

## Plants

## Seed stocks

Report on the source of all seed stocks or other plant material used. If applicable, state the seed stock centre and catalogue number. If plant specimens were collected from the field, describe the collection location, date and sampling procedures.

## Novel plant genotypes

Describe the methods by which all novel plant genotypes were produced. This includes those generated by transgenic approaches, gene editing, chemical/radiation-based mutagenesis and hybridization. For transgenic lines, describe the transformation method, the number of independent lines analyzed and the generation upon which experiments were performed. For gene-edited lines, describe the editor used, the endogenous sequence targeted for editing, the targeting guide RNA sequence (if applicable) and how the editor was applied.

## Authentication

Describe any authentication procedures for each seed stock used or novel genotype generated. Describe any experiments used to assess the effect of a mutation and, where applicable, how potential secondary effects (e.g. second site T-DNA insertions, mosaicism, off-target gene editing) were examined.
